# Supplementary material for: Highly luminescent InP–In(Zn)P/ZnSe/ZnS core/shell/shell colloidal quantum dots with tunable emissions synthesized based on growth-doping
Source: Royal Society of Chemistry journal article supplement (doi:10.1039/d1tc01664d), 2021-01-01
Supplement: d1tc01664d1.pdf [file d1tc01664d1.pdf]

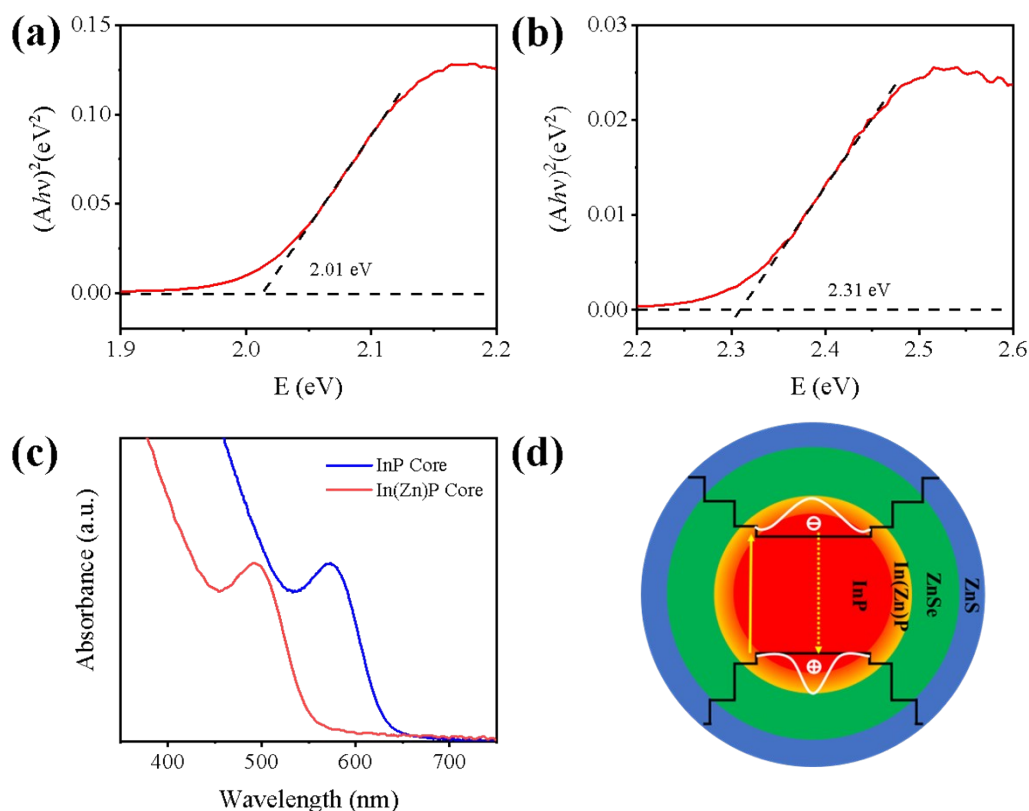

Fig. S1. Band gaps of (a) InP core and (b) In(Zn)P core calculated from their respective corresponding (c) absorption spectra. (d) Schematic diagram of radiative excitonic recombination in InP-In(Zn)P/ZnSe/ZnS core/shell/shell QDs.

The band gaps were calculated according to the follow equation:

$$(Ah\nu/K)^2 = h\nu - E_g$$

where  $A$  stands for absorbance;  $h$  is Planck constant;  $\nu$  is on behalf of light frequency;  $K$  is a fixed constant. Plot  $(Ah\nu)^2$  as a function of  $h\nu$ . The point at which the tangent line of graph intersects the line of  $y=0$  is on behalf of  $E_g$ .

Table S1. Elemental composition of C 1s, O 1s, Zn 2p, Zn 3s, In 3d and P 2p for InP and InP-In(Zn)P QDs.

| Sample      | C 1s (%) | Zn 2p (%) | Zn 3s (%) | In 3d (%) | P 2p (%) |
|-------------|----------|-----------|-----------|-----------|----------|
| InP         | 91.26    | /         | /         | 4.71      | 4.03     |
| InP-In(Zn)P | 84.21    | 1.73      | 4.07      | 5.14      | 4.85     |

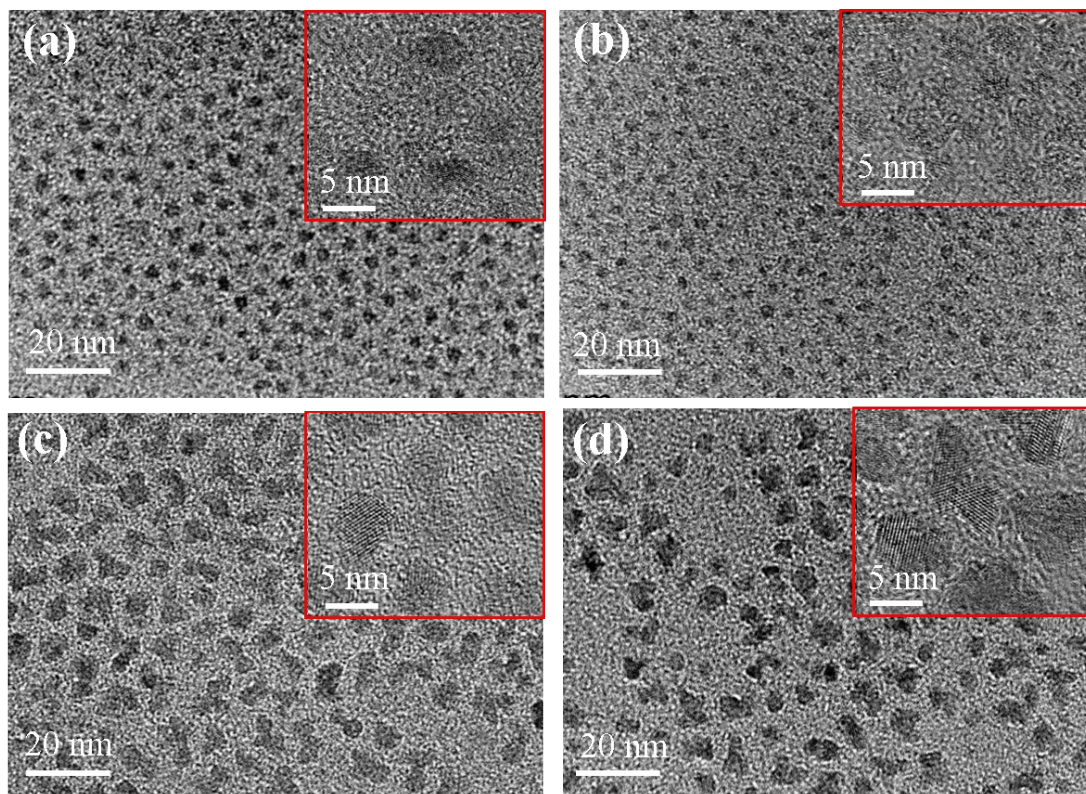

Fig. S2. TEM images and HRTEM images (insets) of (a) InP-In(Zn)P core, (b) InP-In(Zn)P/ZnSe<sub>thin</sub> core/shell, (c) InP-In(Zn)P/ZnSe<sub>thick</sub> core/shell, and (d) InP-In(Zn)P/ZnSe/ZnS core/shell/shell QDs, respectively. The insets are corresponding TEM images at higher magnification.

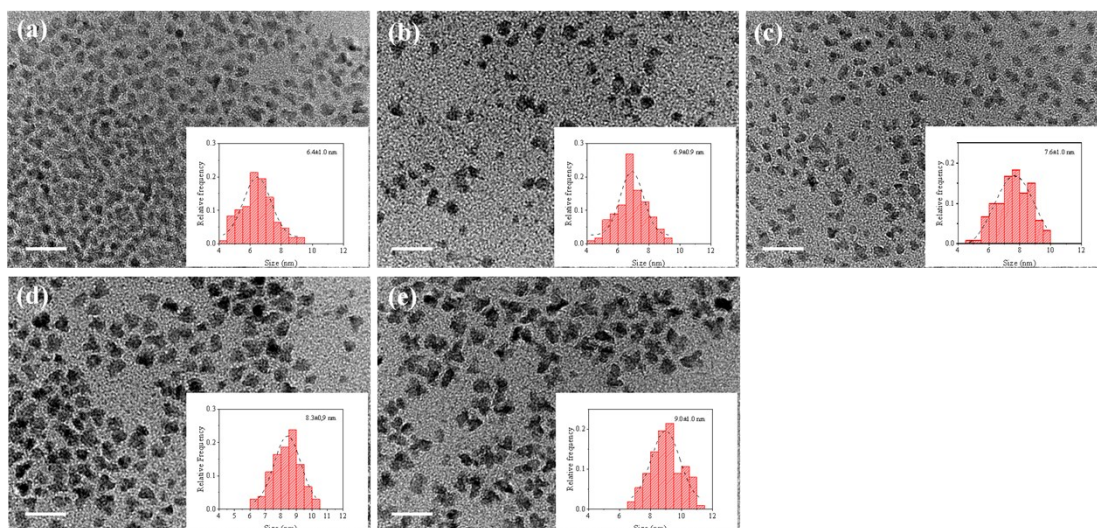

Fig. S3. TEM images and corresponding size distribution diagrams (insets) of InP-In(Zn)P/ZnSe/ZnS core/shell/shell QDs with 569 nm, 588 nm, 601 nm, 616 nm, 630 nm emitting. The scale bar in each TEM image is 20 nm.
